# Supplementary material for: Multi-tissue proteomics identifies molecular signatures for sporadic and genetically defined Alzheimer disease cases
Source: Research Square preprint supplement (doi:10.21203/rs.3.rs-923492/v1), 2021-10-21
Supplement: Supplementary file 1 [file 6de1ad67f3d459d4a06ec33d.xlsx]

## Sheet: ST1
Supplementary Table 1: External datasets used to replicate proteins associated with sporadic AD status in three tissues
Tissue	# proteins identified1	Manuscript	Study Cohort	AD & Controls	Proteomics Platform	# proteins2	# available to validate3	P < 0.05 & same direction4	Expected # Proteins5	Enrichment6	Binomial P7
Brain	12	MassSpec Joint*	ACT+BANNER+BLSA+MSBB+MAYO+ROSMAP	415 AD, 194 CO	MS	10078	9	8	0.225	35.5	1.34277e-12
		Higginbotham 2020	Emory ADRC	10 AD; 10 CO; 10 AD/PD; 10 PD	MS	8817	8	5	0.2	25	5.13422e-07
		Wingo 2020	ROSMAP	103 AD, 78 CO	MS	8356	7	6	0.175	34.29	1.67236e-09
		Johnson 2020	ACT+BANNER+BLSA+MSBB	230 AD, 91 CO	MS	3335	4	3	0.1	30	6.13281e-05
CSF	117	Higginbotham 2020	Emory ADRC	(20 AD, 19 CO)	MS	2875	88	32	2.2	14.55	1.36107e-28
		Whelan 2019	BioFinder	(161 AD; 415 CO)	OLINK	201	9	4	0.225	17.78	4.44976e-05
		ADNI	ADNI	188 AD, 75 CO	CSFMRM	320	7	6	0.175	34.29	1.67236e-09
Plasma	26	Sattlecker 2014	AddNeuroMed	320 AD, 194 CO	SOMAScan	1016	19	9	0.475	18.95	2.80738e-10
1: the number of proteins identified in Knight ADRC discovery cohort
2: the number of proteins available to replicate in the quality controlled replication cohort
3: the number of identified proteins available to replicate in the replication cohort
4: the number of replicated proteins with P < 0.05 and the same direction of effects between discovery and replication
5: the expected number of proteins that may replicate among the available proteins to validate
6: the ratio of the observed number of replicated proteins over the exected number of proteins
7: P-value computed based on the Binomial distribution
*: We downloaded, combined and jointly analyzed 6 publicly available mass-spectrometry brain proteomics data (ACT, BANNER, BLSA, MAYO, MSBB, and ROSMAP).

## Sheet: ST2
Supplementary Table 2: Proteins associated with the sporadic AD status in brain tissue after Bonferroni correction
Protein	Supported by other analysis			P-value in brain tissue1					P-value in CSF tissue			P-value in plasma tissue		P-value from external study				Direction of Effects2
	CSF	Plasma	External	sAD vs CO	CDR at death	Braak Abeta	Braak Tau	Age at Onset	sAD vs CO	pTau/Aβ42	Age at Onset	sAD vs CO	Age at Onset	MassSpec Joint**	Higginbotham	Wingo	Johnson
Midkine			*	3.41e-07	0.000234	1.75e-06	2.17e-08	0.0562						9.61783e-24	6.4e-07	0.00301164		++++?
SMOC1	*	*	*	3.13e-06	1.34e-06	1.74e-11	1.23e-16	0.00282	8.38e-29	4.58404e-64	0.239	0.00213	2.05e-07	4.09671e-20	5.8e-10	0.000697408		++++?
CgA			*	3.63e-06	2.5e-16	0.0163	2.46e-06	0.256	0.174	0.591725	0.78			3.1401e-12	0.086	0.00154604	0.000140675	+++++
HGF	*	*	*	1.37e-05	2.28e-15	0.00088	1.32e-10	2.91e-10	0.00221	0.06526	0.455	0.0165	0.646	8.81831e-05	0.1			+++??
Cardiotrophin-1				2.14e-05	2.09e-14	0.000162	7.14e-10	9.11e-06				0.368	0.854
FSTL1	*	*		3.37e-05	4.41e-08	0.00013	9.79e-07	1.54e-05	0.0342	0.0339613	0.288	0.508	0.00068
NRX1B	*		*	7.84e-05	0.0326	0.497	0.709	0.51	0.106	0.00145634	0.869			8.47039e-18			6.56959e-07	++??+
UBC9	*	*	*	8.4e-05	1.3e-08	0.00924	8.21e-05	0.000611	2.49e-10	2.57487e-11	0.00642	0.00245	0.0815	0.00698649	0.018	0.0135457	0.0182178	+++++
NET1	*	*	*	0.00012	2.97e-05	0.000438	1.19e-06	0.164	0.00222	0.000279001	0.00395	0.281	1.81e-06	4.0206e-15	5.3e-06	0.00444087		++++?
SAP			*	0.000309	4.57e-06	0.396	0.000392	0.739	0.264	0.894952	0.192	0.444	0.554	1.11828e-07	0.0093	0.000448375		++++?
Peroxiredoxin-5				0.000469	0.00786	0.16	8.65e-06	0.535						0.0302824	0.95	0.637175	0.359535	-++++
KI2L4		*		0.000472	0.0184	0.481	0.0803	0.00784				0.023	0.992
# proteins replicated**	6	6	8
The table shows the 12 proteins that were associated with sporadic AD status in brain tissue after Bonferroni correction, as well as the p-values for those proteins for other AD-related traits. For brain we also show the p-value of those proteins with CDR at death, Tau and AB pathology and onset. For CSF, we show p-value of sporadic AD stauts, pTau/Aβ42 ratio and age at onset. For plasma, the p-v…
1: P-value < 0.05 is boldfaced
2: Effects are in the order of Knight ADRC discovery, MS joint, Higginbotham, Wingo, and Johnson. The number of available proteins to replicate varies across cohorts. "?" indicates missing protein in a replication cohort.
*: Denotes when a protein replicated on other tissues or external datsets. 5 proteins replicated on both CSF and plasma
**: We downloaded, combined and jointly analyzed 6 publicly available mass-spectrometry brain proteomics data (ACT, BANNER, BLSA, MAYO, MSBB, and ROSMAP).

## Sheet: ST3
Supplementary Table 3: Proteins associated with the sporadic AD status in CSF after Bonferroni correction
Protein	Support from other tissues				P-value in CSF tissue1		P-value in brain tissue					P-value in plasma tissue		P-value for sAD vs CO from external study			Direction of Effects2
	Brain	Plasma	External	sAD vs CO	pTau/Aβ42	Age at Onset	sAD vs CO	CDR at death	Braak Abeta	Braak Tau	Age at Onset	sAD vs CO	Age at Onset	Higginbotham	Whelan	ADNI CSFMRM
14-3-3 protein zeta/delta	*		*	1.42e-49	8.7306e-60	0.994	0.947	0.0034	0.0339	0.00107	1.41e-05	0.0539	0.573	1.3e-09			++??+
14-3-3E	*		*	9.17e-47	6.80117e-61	0.439	0.65	2.23e-05	0.0736	0.0195	0.000195	0.276	0.448	1.9e-06			++??+
14-3-3	*		*	4.23e-44	2.93566e-56	0.701	0.735	0.00113	0.00572	0.000729	4.19e-06	0.226	0.265	3.1e-09			++??+
Calcineurin	*	*	*	4.52e-40	5.12704e-60	3.39e-05	0.00129	0.94	0.864	0.315	0.254	0.0289	0.565	8.5e-07			++??+
14-3-3 protein beta/alpha	*		*	4.01e-38	1.4204e-47	0.134	0.803	0.00124	0.0262	0.000229	5.55e-05	0.764	0.139	2.6e-05			++??+
UBE2N		*		7.49e-33	2.36611e-37	0.178	0.285	0.558	0.581	0.548	0.376	0.000933	0.0272	0.5867			+-??+
Integrin a1b1		*		1.89e-30	9.72049e-40	0.162	0.0758	0.495	0.695	0.0782	0.293	0.000144	0.306	0.016			+-??+
PHI	*		*	3.6e-30	1.48281e-32	0.392	0.568	0.00339	0.0156	0.000988	4.23e-05			0.00061			++??+
SMOC1	*	*	*	8.38e-29	4.58404e-64	0.239	3.13e-06	1.34e-06	1.74e-11	1.23e-16	0.00282	0.00213	2.05e-07	6.9e-09			++??+
prostatic binding protein		*	*	1.21e-23	2.05823e-20	0.99						3.57e-05	0.41	8.4e-06			++??+
UFC1	*			3.48e-23	1.86483e-31	0.0232	0.932	0.00699	0.384	0.00779	0.00729			0.7605			+-??+
TCTP	*		*	1.21e-21	3.04577e-27	0.182	0.944	0.691	0.853	0.216	0.0333			0.00015			++??+
Cyclophilin A			*	4.33e-20	1.15403e-26	0.308						0.0817	0.977	7.7e-05			++??+
MDHC			*	1.07e-19	8.07726e-28	0.0629								5.7e-06			++??+
HSP 90b	*			1.56e-19	4.57161e-25	0.183	0.548	0.01	0.267	0.049	0.0178	0.504	0.451	0.4389			++??+
SUMO3	*		*	2.14e-18	1.59144e-34	0.607	0.192	9.13e-06	0.0309	0.0377	0.0211	0.432	0.0852	1.7e-08			++??+
HSP 90a/b	*			3.09e-18	3.6104e-23	0.355	0.993	0.000874	0.129	0.00351	0.00135	0.87	0.853	0.3663			++??+
PKB a/b/g	*	*		5.77e-17	2.90214e-17	0.0724	0.608	0.0345	0.00338	0.00688	4.55e-07	0.000346	0.0104				+???+
CRK		*	*	9.23e-17	1.44076e-23	0.00487	0.441	0.663	0.68	0.0794	0.0649	0.0468	0.254	2.8e-08			++??+
ERK-1	*	*		3.03e-16	1.74934e-18	0.355	0.0289	0.0133	0.256	0.0931	0.629	1.79e-09	0.197				+???+
Rab GDP dissociation inhibitor beta	*		*	8.67e-16	1.41358e-13	0.0376	0.683	0.0108	0.235	0.00978	2.28e-05			2.1e-05			++??+
PKC-G				1.03e-15	1.31282e-30	0.00315	0.0796	0.729	0.705	0.85	0.372						+???+
MIF	*		*	5.76e-15	3.51434e-16	0.244	0.16	8.07e-08	0.00791	1.94e-05	0.00183	0.322	0.699	0.0038			++??+
PGP9.5	*		*	5.56e-14	8.38526e-19	0.348	0.000847	0.111	0.163	0.0365	0.0813			0.00013			++??+
Myokinase, human	*			6.49e-14	1.62255e-12	0.332	0.536	0.000232	0.954	0.343	0.88			0.691			++??+
aldolase A			*	7.43e-14	1.75782e-27	0.613								2.7e-07		2.79658e-08	++?++
Spondin-1	*		*	1.16e-13	7.35719e-18	0.802	0.0599	0.0583	0.111	0.0101	0.00139			0.015		0.00025914	++?++
Osteopontin	*		*	1.18e-13	1.11282e-16	0.408	0.217	1.19e-06	0.0191	0.000626	0.0063			0.018			++??+
NSE	*		*	8.49e-13	6.62148e-21	0.361	0.693	2.39e-05	0.0224	7.18e-05	0.117	0.0502	0.549	0.00091			++??+
Ubiquitin+1	*	*		1.23e-11	8.63588e-21	0.294	0.766	0.000826	0.116	0.00551	0.182	0.0214	0.572				+???+
SHP-2	*			1.75e-11	4.77838e-15	0.0577	0.0136	0.852	0.195	0.462	0.126						+???+
GFAP			*	2.34e-11	7.64099e-07	0.616	0.058	0.241	0.981	0.963	0.462	0.742	0.886	0.2178		0.0150367	++?++
sLRP1				5.08e-11	2.84606e-15	0.607						0.368	0.106	0.1897			++??+
RUXF	*	*		8.35e-11	4.51439e-15	0.0349	0.00861	0.485	0.116	0.0167	0.191	0.00406	0.312				-???-
alpha-1-antichymotrypsin complex	*			9.51e-11	8.01915e-10	0.00315	0.041	0.253	0.141	0.0833	0.0346						+???+
UBC9	*	*		2.49e-10	2.57487e-11	0.00642	8.4e-05	1.3e-08	0.00924	8.21e-05	0.000611	0.00245	0.0815				+???+
QORL1		*		4.14e-10	9.85993e-13	0.95	0.535	0.47	0.447	0.462	0.758	0.031	0.0517				-???-
Chitotriosidase-1		*	*	4.24e-10	6.11445e-11	0.0705	0.226	0.0917	0.867	0.28	0.0919	0.0115	0.000332	0.0035	3.67667e-11		+++?+
EphA5			*	6.71e-10	0.0917637	0.193	0.185	0.471	0.875	0.21	0.964	0.405	0.862	0.0068			--??-
Peroxiredoxin-1	*	*	*	6.82e-10	0.00063206	0.0929	0.161	4.9e-06	0.134	0.000158	1.52e-05	0.00396	0.0594	0.6271		7.13308e-05	+-?++
NSF1C		*		1.03e-09	8.02868e-20	0.799	0.624	0.429	0.965	0.882	0.0746	0.0397	0.574	0.781			++??+
UFM1	*	*		1.09e-09	8.64416e-10	0.632	0.391	0.0129	0.801	0.827	0.511	0.0225	0.731	0.3491			++??+
IRF1		*		1.18e-09	3.72244e-05	0.056						0.274	0.00442				-???-
Somatostatin-28	*		*	1.69e-09	0.07685	0.0605	0.131	0.411	0.227	0.0305	0.786	0.401	0.593	0.0058			--??-
NDP kinase B			*	2.48e-09	7.16766e-11	0.058	0.169	0.938	0.782	0.809	0.326			0.017			++??+
LRRK2	*	*		8.27e-09	1.47768e-06	0.376	0.399	0.0331	0.233	0.124	0.37	0.00143	0.0587				-???-
TNF sR-II		*		2.04e-08	4.23437e-13	1.1e-06	0.127	0.351	0.584	0.116	0.593	0.0579	1.88e-07	0.2329			++??+
HINT1	*			3.55e-08	2.92886e-05	0.458	0.6	0.0226	0.938	0.448	0.721	0.171	0.572	0.9006			++??+
Stress-induced-phosphoprotein 1	*			8.54e-08	1.34273e-09	0.218	0.383	1.75e-07	0.0617	9.05e-05	0.000104	0.113	0.159	0.9225			+-??+
a-Synuclein	*			9.33e-08	6.70016e-10	0.0133	0.197	0.0137	0.0382	0.0146	1.95e-05	0.153	0.637	0.3054			++??+
STX1a	*			1.4e-07	2.32927e-26	0.0384	0.0135	0.223	0.869	0.339	0.00507	0.527	0.618	0.6195			++??+
Peroxiredoxin-6	*	*	*	1.58e-07	2.44036e-07	0.078	0.107	3.22e-07	0.0078	3.17e-05	1.21e-05	0.00287	0.0242	0.1158		0.00307346	+-?++
PolyUbiquitin K48	*		*	1.75e-07	1.18717e-14	0.158	0.694	0.000541	0.107	0.000411	1.05e-05					0.0199043	+??++
FABP	*	*	*	1.83e-07	1.63711e-11	0.0186	0.49	0.133	0.151	0.0382	0.0542	0.0275	0.0015	2e-05			++??+
LDH-H 1				2.92e-07	0.00016343	0.0799	0.447	0.145	0.364	0.481	0.735			0.0707			++??+
6-Phosphogluconate dehydrogenase	*			4.99e-07	4.31876e-05	0.905	0.05	3.5e-07	0.000703	8.43e-08	2.97e-06			0.784			++??+
AK1A1		*	*	5.43e-07	8.39112e-06	0.509	0.469	0.113	0.707	0.125	0.262	0.211	0.0317	0.0011			++??+
LYNB	*			7.65e-07	0.00401233	0.956	0.0164	0.622	0.539	0.175	0.0734						-???-
JAG1				3.06e-06	0.0184916	0.19						0.145	0.554	0.0978			--??-
CSK	*	*		3.07e-06	0.0338587	0.104	0.0347	0.787	0.311	0.0685	0.00403	0.0147	0.177				-???-
IGF-II receptor	*	*	*	3.13e-06	1.31909e-05	0.504	0.467	0.463	0.836	0.364	0.00584	0.103	0.0302	0.039			++??+
PAFAH beta subunit	*			3.77e-06	0.000100669	0.0471	0.841	0.0074	0.288	0.925	0.443	0.347	0.187	0.3415			+-??+
eIF-4H	*		*	3.96e-06	2.04144e-07	0.257	0.225	0.00331	0.0123	0.00155	7.53e-08	0.277	0.502	0.048			++??+
CXCL16, soluble	*	*		4.23e-06	0.092709	2.01e-06	0.216	0.51	0.786	0.429	0.0329	0.564	0.0231	0.084	0.585519		+++?+
Ferritin	*	*		4.77e-06	0.0286179	0.0119	0.544	0.000677	0.128	0.00255	0.000451	0.629	0.00277	0.201			++??+
EMAP-2		*		6.06e-06	2.43685e-12	0.00191	0.958	0.751	0.91	0.0542	0.117	0.000236	0.138				-???-
HVEM		*	*	6.79e-06	0.15268	0.12						0.279	0.00674	0.2414	0.00185231		---?-
14-3-3 protein theta				7.24e-06	1.87848e-05	0.00989	0.427	0.6	0.659	0.426	0.273			0.0885			++??+
HEMK2	*			7.49e-06	0.0908794	0.78	0.91	0.00274	0.0568	0.000777	0.000463	0.877	0.622				-???-
CK-BB	*	*		1.02e-05	9.01919e-06	0.483	0.17	0.083	0.0231	0.0186	0.00182	0.996	0.0145	0.1846			+-??-
Protease nexin I				1.03e-05	0.00276915	0.607	0.0643	0.938	0.472	0.347	0.885	0.189	0.873	0.8094			--??-
VEGF-C	*			1.05e-05	0.15432	0.448	0.871	0.156	0.167	0.0109	0.014	0.151	0.693	0.3729			-+??-
D-dimer	*	*		1.07e-05	0.00117137	0.674	0.559	0.00794	0.843	0.401	0.397	0.006	0.117	0.4271			+-??+
PDE4D		*		1.81e-05	0.03653	0.378	0.987	0.47	0.958	0.626	0.154	0.00907	0.717				-???-
LCMT1				1.93e-05	0.00243134	0.295	0.227	0.675	0.857	0.123	0.454	0.759	0.797				-???-
OLR1			*	2.11e-05	1.28983e-15	0.301	0.919	0.248	0.347	0.134	0.992	0.874	0.606	0.037			++??+
TNF sR-I		*		2.47e-05	1.99704e-07	4.27e-06	0.195	0.92	0.906	0.613	0.443	0.112	1.07e-07	0.0664			++??+
Fibrinogen	*			2.55e-05	0.00136234	1	0.828	0.00632	0.188	0.662	0.683	0.61	0.834	0.4271			+-??+
C6	*			2.61e-05	0.0121845	0.00414	0.366	0.348	0.859	0.291	0.0254	0.277	0.536	0.3195			+-??+
phosphoglycerate kinase 1	*			2.8e-05	3.56974e-07	0.127	0.442	0.0989	0.44	0.047	0.028			1.6e-05			-+??-
TGF-b R III		*		2.82e-05	0.000841761	0.00263	0.219	0.067	0.674	0.888	0.204	0.535	0.00257	0.7809			+-??+
Ubiquitin				2.89e-05	0.000705208	0.121											+???+
CBPE	*			3.24e-05	0.142015	0.612	0.429	0.000943	0.0715	0.0375	9.6e-06	0.0704	0.629	0.2622			+-??+
DAN		*		3.31e-05	0.0821167	0.0054	0.871	0.872	0.944	0.162	0.64	0.244	8.66e-09	0.2921	0.30307	0.0817524	-----
ERP29	*	*		3.85e-05	0.0906886	6.42e-11	0.204	0.637	0.153	0.635	0.00554	0.0136	0.299				+???+
HSP70 protein 8	*			4.06e-05	0.00154311	0.247	0.916	0.000681	0.284	0.0479	8.94e-05			0.9345			+-??-
CATE				4.18e-05	0.00307986	0.183	0.106	0.588	0.682	0.156	0.142	0.789	0.0947				-???-
XPNPEP1	*			4.37e-05	2.6631e-08	0.0802	0.569	0.1	0.247	0.0684	0.0026			0.6794			++??+
Alpha enolase			*	4.58e-05	2.4175e-07	0.386								4.8e-05			++??+
Contactin-5		*	*	5e-05	0.171063	0.295	0.914	0.817	0.809	0.276	0.318	0.0406	0.655	0.6027	0.0163751		-+-?-
GFRa-2	*	*		5.05e-05	0.537939	0.636	0.645	0.00106	0.106	0.0277	0.212	0.0458	0.907	0.4769			--??-
Fibrinogen g-chain dimer	*	*		5.49e-05	0.00995778	0.492	0.693	2.46e-05	0.924	0.0805	0.0724	0.00788	0.502	0.4271			+-??+
PUR8		*		5.78e-05	0.000168684	0.00932	0.987	0.392	0.497	0.48	0.727	0.00098	0.387	0.6436			+-??+
TFPI			*	6.53e-05	7.76227e-07	0.00015	0.203	0.325	0.809	0.146	0.438	0.934	0.916	0.4544	1.16954e-05		+++?+
Angiopoietin-1				6.6e-05	0.0583652	0.00173	0.73	0.6	0.337	0.0959	0.375	0.0655	0.426				+???+
CSH	*			6.96e-05	4.13178e-05	0.26	0.773	0.0444	0.462	0.219	0.236	0.77	0.994				-???-
Corticotropin-lipotropin			*	8.45e-05	0.243601	0.109						0.233	0.124	0.0014			--??-
PSME1	*	*		9.33e-05	4.45188e-09	0.0213	0.793	0.0336	0.812	0.463	0.148	0.00823	0.312	0.9503			--??+
Triosephosphate isomerase		*	*	9.34e-05	1.11544e-08	0.396	0.75	0.639	0.712	0.974	0.733	0.0215	0.0041	0.012			++??+
DSC2		*		0.000114	0.000879926	1.79e-05						0.345	9.55e-06	0.1357			++??+
H6ST1				0.000127	0.106053	0.00113	0.114	0.191	0.134	0.988	0.449			0.2627			++??+
COMMD7				0.000129	0.0018498	0.0644	0.733	0.893	0.15	0.0638	0.0752	0.104	0.935				-???-
Testican-1	*			0.000154	0.819998	0.0146	0.426	0.662	0.684	0.136	0.0222			0.3969	0.263201		++-?-
URB	*			0.000159	0.0174153	8.2e-07	0.743	0.0237	0.487	0.066	0.213			0.8633			+-??+
GI24	*			0.000161	0.00619205	0.00244	0.0126	0.792	0.401	0.121	0.000213			0.2687			+-??+
Apo E2	*	*		0.000176	3.86665e-06	0.000771	0.714	0.524	0.226	0.0297	0.00565	0.00147	0.0846				+???+
STRATIFIN				0.000179	3.45533e-08	9.24e-05	0.273	0.428	0.687	0.0538	0.705	0.725	0.133	0.1679			+-??+
MMP-7	*	*		0.000192	0.257602	0.000314	0.292	0.951	0.281	0.261	0.0175	0.00266	1.02e-05				+???+
GRN	*	*		0.000195	2.14061e-05	0.146	0.669	0.0101	0.547	0.000299	0.274	0.914	0.0272	0.3693	0.585488		+--?+
Moesin	*	*		0.000201	0.38889	0.72	0.521	0.00127	0.0239	0.0711	1.63e-07	0.0755	0.0175	0.1952			-+??-
HSP 70	*			0.000202	0.0246194	0.0877	0.484	0.005	0.988	0.176	0.000121						+???-
Ephrin-A4	*	*		0.00021	0.0101622	1.15e-05	0.931	0.00309	0.214	0.263	0.0013	0.155	0.000397		0.0203362		+?-?+
Catalase				0.000217	0.000422285	0.652	0.334	0.917	0.95	0.329	0.404			0.7163			+-??-
ADAM 9	*			0.000235	3.83667e-05	0.146	0.423	0.0784	0.0147	0.0187	0.719			0.5988			++??+
BGN				0.000237	0.313393	0.899	0.396	0.63	0.868	0.875	0.954	0.414	0.682	0.5334			+-??+
COLEC12				0.000258	0.503431	0.147	0.457	0.296	0.354	0.578	0.16	0.187	0.678	0.0556			++??+
RASA1	*			0.000288	0.0810704	0.789	0.999	0.0282	0.536	0.709	0.402						-???-
# proteins replicated*	71	47	39
The table shows the 117 proteins that were associated with AD status in CSF after Bonferroni correction, as well as the p-values for those proteins for other AD-related traits. For CSF we also show the p-value for the associaton with pTau/Aβ42 ratio and age at onset. For brain tissue we show the p-value for sporadic AD status, CDR at death, Tau and AB pathology and onset. For plasma the p-value i…
1: P-value < 0.05 is boldfaced
2: Effects are in the order of Knight ADRC discovery, Higginbotham, Whelan 2019 and ADNI cohort. The number of available proteins to replicate varies across cohorts. "?" indicates missing protein in a replication cohort.
*: Denotes when a protein replicated on other tissues or external datsets. 27 proteins were replicated in both brain and plasma

## Sheet: ST4
Supplementary Table 4: Proteins associated with the sporadic AD status in plasma after Bonferroni correction
Protein	Support from other tissues			P-value in plasma tissue1		P-value in brain tissue					P-value in CSF tissue			P-value from sAD vs CO	Direction of Effects2
	Brain	CSF	External	sAD vs CO	Age at Onset	sAD vs CO	CDR at death	Braak Abeta	Braak Tau	Age at Onset	sAD vs CO	pTau/Aβ42	Age at Onset	AddNeuroMed
PCSK7		*		1.12e-10	0.239	0.639	0.139	0.504	0.586	0.416	0.036	0.189126	0.0109	0.0822218	--
Apo B				1.57e-09	0.684	0.457	0.0894	0.217	0.366	0.677				0.226912	+-
ERK-1	*	*	*	1.79e-09	0.197	0.0289	0.0133	0.256	0.0931	0.629	3.03e-16	1.74934e-18	0.355	0.00224381	--
BARK1	*		*	2.13e-08	0.187	0.724	0.000726	0.24	0.00215	0.0285				0.000220313	--
GNS	*		*	4.1e-07	0.44	0.097	0.00569	0.556	0.139	0.0539	0.25	0.0925732	0.759	0.0392722	--
CAMK2D	*		*	7.65e-07	0.821	0.344	0.0658	0.0514	0.00175	0.000631				0.00501164	--
CDON	*	*	*	2.25e-06	2.97e-05	0.868	0.764	0.701	0.0891	0.0194	0.159	0.0300184	0.807	0.00946986	--
SHC1	*	*		3.97e-06	0.258	0.166	0.000118	0.00869	0.000145	0.000144	0.3	0.453791	0.000664		-?
HMG-1	*		*	6.76e-06	0.796	0.0341	0.00246	0.0862	0.0163	0.11				0.0232957	--
VEGF-D				6.86e-06	0.072	0.242	0.497	0.455	0.515	0.879	0.137	0.903833	0.447		+?
C3b				1.14e-05	0.692									1.67634e-11	+-
tPA	*		*	1.22e-05	0.138	0.353	1.33e-05	0.0616	0.0482	1.91e-06	0.785	0.784038	0.699	0.0426811	--
RELT		*	*	1.94e-05	0.00925						0.121	0.376924	0.000207	0.0324663	--
SMAD3				1.96e-05	0.0147	0.383	0.667	0.939	0.692	0.659					-?
KPCI	*			2.04e-05	0.782	0.306	0.183	0.787	0.00963	0.000586				0.172581	--
hnRNP A/B	*	*		3.48e-05	0.717	0.238	0.000226	0.0113	0.00228	0.198	0.000577	4.01225e-07	0.0185	0.0723422	-+
prostatic binding protein		*		3.57e-05	0.41						1.21e-23	2.05823e-20	0.99	0.0041435	-+
SET	*	*		3.73e-05	0.0105	0.34	0.0152	0.353	0.381	0.00834	0.0458	0.0566841	0.0129		-?
PIANP	*	*		3.77e-05	0.00014	0.834	0.34	0.325	0.564	0.00227	0.0194	0.85177	0.558		-?
FAM107B	*			4.27e-05	0.136	0.0262	0.0295	0.313	0.103	0.0526				0.628046	--
XTP3A	*	*		6.83e-05	0.0972	0.0104	0.00926	0.0415	0.238	0.000478	0.736	0.625283	4.6e-05	0.389118	--
EFNB2		*		7.77e-05	0.00287	0.738	0.682	0.788	0.5	0.783	0.106	0.876477	0.00198		-?
SEM6B	*			8.97e-05	0.0295	0.432	0.0686	0.838	0.00495	0.168	0.764	0.500028	0.216		-?
PIK3CA/PIK3R1	*			0.000103	0.768	0.0473	0.00255	0.0973	0.0213	3.1e-05				0.730747	--
Integrin a1b1		*	*	0.000144	0.306	0.0758	0.495	0.695	0.0782	0.293	1.89e-30	9.72049e-40	0.162	0.00979135	--
PKC-B-II		*		0.000183	0.261	0.0756	0.162	0.26	0.117	0.109	0.00899	9.25403e-13	0.093	0.337154	--
# proteins replicated*	16	13	9
The table shows the 26 proteins that were associated with AD status in plasma after Bonferroni correction, as well as the p-values for those proteins for other AD-related traits. For plasma we also show the p-value for the associaton with age at onset. For brain tissue we show the p-value for sporadic AD status, CDR at death, Tau and AB pathology and onset. For CSF the p-value is for the associat…
1: P-value < 0.05 is boldfaced
2: Effects are in the order of Knight ADRC discovery, Higginbotham, Whelan 2019 and ADNI cohort. The number of available proteins to replicate varies across cohorts. "?" indicates missing protein in a replication cohort.
*: Denotes when a protein replicated on other tissues or external datsets. 7 proteins were replicated in both brain and plasma

## Sheet: ST5
Supplementary Table 5: External datasets to replicate proteins that were identified and replicated across-tissues
Tissue	# proteins identified1	# externaly valiated2	# validated by other 2 tissues3	# externally available to validate4	also externally validated5	Expected # Proteins6	Enrichment7	Binomial P8
Brain	12	8	5	4	4	0.1	40	3.90625e-07
CSF	117	39	27	16	6	0.4	15	1.57502e-06
Plasma	26	9	7	4	2	0.1	20	0.00362617
1: the number of proteins identified in Knight ADRC discovery cohort
2: the number of replicated proteins in the external replication cohorts
3: the number of proteins validated in the remaining two tissues
4: the number of proteins available in the replication cohort among across-tissue validated proteins
5: the number of externally and across-tissue replicated proteins
6: the expected number of proteins that may replicate among the available proteins to validate
7: the ratio of the observed number of replicated proteins over the exected number of proteins
8: P-value computed based on the Binomial distribution

## Sheet: ST6
Supplementary Table 6: Proteins associated with TREM2 variant carriers vs controls in brain tissue after Bonferroni correction
Protein	Support from other tissue		P-value in brain tissue1							P-value in CSF					P-value in plasma
	CSF	Plasma	TREM2 vs CO	TREM2 vs sAD	sAD vs CO	CDR at death	Braak Abeta	Braak Tau	Age at Onset	TREM2 vs CO	TREM2 vs sAD	sAD vs CO	pTau/Aβ42	Age at Onset	TREM2 vs CO	TREM2 vs sAD	sAD vs CO	Age at Onset
PSA2		*	5.7e-07	0.0255	0.13	3.26e-06	0.00909	0.00153	9.77e-05						0.452	0.00293	0.0135	0.638
PACAP-27	*		5.28e-05	1.53e-08	0.302	7.59e-05	0.0397	0.0051	0.0421	0.945	0.136	0.00272	0.581431	0.167	0.125	0.626	0.762	0.108
ALT	*	*	7e-05	4.73e-08	0.578	0.439	0.438	0.589	0.554	0.28	0.63	0.0272	0.0652394	1.01e-08	0.00685	0.34	0.00399	0.577
Cofilin-1	*		8.8e-05	0.00474	0.156	0.0313	0.136	0.0107	0.00321	0.206	0.67	0.000481	5.53244e-05	0.119	0.551	0.781	0.683	0.332
HSP70 protein 8	*		0.000112	7.16e-07	0.916	0.000681	0.284	0.0479	8.94e-05	0.18	0.0257	4.06e-05	0.00154311	0.247
PSA1		*	0.000146	0.000362	0.578	0.00128	0.0105	0.0259	0.0012						0.0929	0.435	0.0408	0.616
CgA			0.00036	0.0169	3.63e-06	2.5e-16	0.0163	2.46e-06	0.256	0.587	0.185	0.174	0.591725	0.78
a-Synuclein	*	*	0.000503	0.036	0.197	0.0137	0.0382	0.0146	1.95e-05	0.0111	0.506	9.33e-08	6.70016e-10	0.0133	0.000522	0.0548	0.153	0.637
HSP 70	*		0.000604	2.23e-06	0.484	0.005	0.988	0.176	0.000121	0.16	0.0438	0.000202	0.0246194	0.0877
# proteins replicated*	6	4
The table shows the 9 proteins that were associated with TREM2 risk variant carriers vs controls in brain after Bonferroni correction, as well as the p-values for those proteins for other AD-related traits. For brain tissue we show the p-value for TREM2 vs sporadic AD, sporadic AD status, CDR at death, Tau and AB pathology and onset. For CSF, the p-value is for the association of TREM2 variant ca…
1: P-value < 0.05 is boldfaced
*: Denotes when a protein replicated on other tissues

## Sheet: ST7
Supplementary Table 7: Proteins associated with the TREM2 variant carriers vs. sporadic AD in brain tissue after Bonferroni correction
Protein	Support from other tissues		P-value in brain1							P-value in CSF					P-value in plasma
	CSF	Plasma	TREM2 vs sAD	TREM2 vs CO	sAD vs CO	CDR at death	Braak Abeta	Braak Tau	Age at Onset	TREM2 vs sAD	TREM2 vs CO	sAD vs CO	pTau/Aβ42	Age at Onset	TREM2 vs sAD	TREM2 vs CO	sAD vs CO	Age at Onset
GPDA	*		1.2e-08	0.00327	0.642	0.000409	0.0204	5.06e-05	0.000182	0.36	0.846	0.16	0.0448761	0.612	0.656	0.201	0.133	0.282
SOD		*	1.28e-08	0.00314	0.737	0.000468	0.293	0.0204	0.000142						0.935	0.0464	0.0073	0.149
PACAP-27	*		1.53e-08	5.28e-05	0.302	7.59e-05	0.0397	0.0051	0.0421	0.136	0.945	0.00272	0.581431	0.167	0.626	0.125	0.762	0.108
ALT	*	*	4.73e-08	7e-05	0.578	0.439	0.438	0.589	0.554	0.63	0.28	0.0272	0.0652394	1.01e-08	0.34	0.00685	0.00399	0.577
HSP 60	*		3.31e-07	0.0173	0.0753	0.778	0.867	0.609	0.0225	0.0204	0.0703	0.041	0.552814	0.0514
HSP70 protein 8	*		7.16e-07	0.000112	0.916	0.000681	0.284	0.0479	8.94e-05	0.0257	0.18	4.06e-05	0.00154311	0.247
MIS	*	*	9.44e-07	0.00446	0.718	0.372	0.21	0.289	0.216	0.396	0.0901	0.867	0.969036	0.0359	0.0304	0.989	0.119	0.00352
HSP 70	*		2.23e-06	0.000604	0.484	0.005	0.988	0.176	0.000121	0.0438	0.16	0.000202	0.0246194	0.0877
LRRK2	*	*	9.3e-06	0.0403	0.399	0.0331	0.233	0.124	0.37	0.00693	0.525	8.27e-09	1.47768e-06	0.376	0.133	0.0125	0.00143	0.0587
SHP-2	*		4.02e-05	0.189	0.0136	0.852	0.195	0.462	0.126	0.592	0.034	1.75e-11	4.77838e-15	0.0577
PAFAH beta subunit	*	*	5.54e-05	0.00625	0.841	0.0074	0.288	0.925	0.443	0.416	0.333	3.77e-06	0.000100669	0.0471	0.0425	0.0492	0.347	0.187
annexin VI			0.00012	0.00117	0.821	0.00102	0.0288	0.00661	0.0052	0.424	0.757	0.122	0.545408	0.245
RS3		*	0.000235	0.00425	0.398	0.498	0.926	0.776	0.937						0.252	0.0133	0.0205	0.665
CK2-A1:B	*		0.000281	0.133	0.406	0.00411	0.448	0.00364	0.000421	0.00926	0.0543	0.167	0.172867	0.634	0.655	0.668	0.64	0.113
ATP synthase beta chain			0.000292	0.00734	0.648	0.00733	0.058	0.0231	0.0322
PSA1		*	0.000362	0.000146	0.578	0.00128	0.0105	0.0259	0.0012						0.435	0.0929	0.0408	0.616
CSH	*		0.000368	0.054	0.773	0.0444	0.462	0.219	0.236	0.0289	0.94	6.96e-05	4.13178e-05	0.26	0.218	0.52	0.77	0.994
IMB1	*		0.000392	0.0136	0.552	0.00235	0.0321	0.00109	1.31e-05	0.0447	0.00517	0.275	0.0396592	0.368
CBG			0.000404	0.0245	0.403	0.349	0.467	0.302	0.27
CKAP2	*		0.000462	0.108	0.319	0.998	0.278	0.92	0.923	0.624	0.0635	0.00591	4.92698e-09	0.699	0.103	0.121	0.437	0.532
CBX5		*	0.000466	0.499	0.0545	0.258	0.829	0.139	0.19						0.22	0.862	0.576	0.00337
Glutamate carboxypeptidase			0.000479	0.00147	0.345	0.000412	0.123	0.017	0.00188						0.944	0.418	0.269	0.527
CSK21		*	0.00065	0.0296	0.818	2.31e-05	0.256	0.00488	1.32e-05						0.0722	0.402	0.103	0.0333
# proteins replicated	14	9
The table shows the 23 proteins that were associated with TREM2 risk variant carriers vs sporadic AD cases in brain after Bonferroni correction, as well as the p-values for those proteins for other AD-related traits. For brain tissue we show the p-value for TREM2 risk variant carriers vs controls, sporadic AD status, CDR at death, Tau and AB pathology and onset. For CSF the p-value is for the ass…
1: P-value < 0.05 is boldfaced
*: Denotes when a protein replicated on other tissues

## Sheet: ST8
Supplementary Table 8: Proteins associated with the TREM2 variant carriers vs controls in CSF after Bonferroni correction
Protein	Support from other tissues		P-value in CSF1					P-value in brain							P-value in plasma
	Brain	Plasma	TREM2 vs CO	TREM2 vs sAD	sAD vs CO	pTau/Aβ42	Age at Onset	TREM2 vs CO	TREM2 vs sAD	sAD vs CO	CDR at death	Braak Abeta	Braak Tau	Age at Onset	TREM2 vs CO	TREM2 vs sAD	sAD vs CO	Age at Onset
14-3-3E	*	*	3.65e-12	0.457	9.17e-47	6.80117e-61	0.439	0.855	0.577	0.65	2.23e-05	0.0736	0.0195	0.000195	0.0354	0.136	0.276	0.448
14-3-3 protein zeta/delta	*	*	9.3e-12	0.215	1.42e-49	8.7306e-60	0.994	0.0296	0.0795	0.947	0.0034	0.0339	0.00107	1.41e-05	0.0205	0.0167	0.0539	0.573
14-3-3	*		6.52e-10	0.252	4.23e-44	2.93566e-56	0.701	0.0591	0.0696	0.735	0.00113	0.00572	0.000729	4.19e-06	0.861	0.805	0.226	0.265
14-3-3 protein beta/alpha	*		6.58e-09	0.32	4.01e-38	1.4204e-47	0.134	0.0307	0.0525	0.803	0.00124	0.0262	0.000229	5.55e-05	0.58	0.835	0.764	0.139
Somatostatin-28	*	*	3.07e-08	1.02e-11	1.69e-09	0.07685	0.0605	0.0264	0.407	0.131	0.411	0.227	0.0305	0.786	0.0197	0.0086	0.401	0.593
TCTP	*		2.26e-07	0.697	1.21e-21	3.04577e-27	0.182	0.922	0.881	0.944	0.691	0.853	0.216	0.0333
MDHC			5.1e-07	0.493	1.07e-19	8.07726e-28	0.0629
SUMO3	*		5.77e-07	0.698	2.14e-18	1.59144e-34	0.607	0.35	0.298	0.192	9.13e-06	0.0309	0.0377	0.0211	0.564	0.235	0.432	0.0852
PolyUbiquitin K48	*		7.15e-07	0.0666	1.75e-07	1.18717e-14	0.158	0.252	0.184	0.694	0.000541	0.107	0.000411	1.05e-05
Integrin a1b1		*	8.7e-07	0.546	1.89e-30	9.72049e-40	0.162	0.616	0.953	0.0758	0.495	0.695	0.0782	0.293	0.00122	0.629	0.000144	0.306
Nucleoside diphosphate kinase A			8.96e-07	0.000195	0.0304	0.00179357	0.337	0.873	0.283	0.546	0.462	0.212	0.195	0.675
NSF1C		*	1.04e-06	0.0857	1.03e-09	8.02868e-20	0.799	0.26	0.372	0.624	0.429	0.965	0.882	0.0746	0.803	0.575	0.0397	0.574
NDP kinase B			1.36e-06	0.093	2.48e-09	7.16766e-11	0.058	0.38	0.0364	0.169	0.938	0.782	0.809	0.326
UBE2N		*	1.85e-06	0.047	7.49e-33	2.36611e-37	0.178	0.822	0.368	0.285	0.558	0.581	0.548	0.376	0.00451	0.539	0.000933	0.0272
XPNPEP1	*		2.65e-06	0.00685	4.37e-05	2.6631e-08	0.0802	0.141	0.0247	0.569	0.1	0.247	0.0684	0.0026
UFC1	*		3.92e-06	0.518	3.48e-23	1.86483e-31	0.0232	0.0775	0.000685	0.932	0.00699	0.384	0.00779	0.00729
SMOC1	*	*	5.53e-06	0.105	8.38e-29	4.58404e-64	0.239	0.0105	0.968	3.13e-06	1.34e-06	1.74e-11	1.23e-16	0.00282	0.195	0.928	0.00213	2.05e-07
prostatic binding protein		*	7.49e-06	0.124	1.21e-23	2.05823e-20	0.99								0.000421	0.363	3.57e-05	0.41
Ubiquitin+1	*	*	1.54e-05	0.356	1.23e-11	8.63588e-21	0.294	0.105	0.0168	0.766	0.000826	0.116	0.00551	0.182	0.00486	0.184	0.0214	0.572
PKC-G			1.74e-05	0.866	1.03e-15	1.31282e-30	0.00315	0.802	0.0362	0.0796	0.729	0.705	0.85	0.372
GFAP			2.77e-05	0.416	2.34e-11	7.64099e-07	0.616	0.185	0.00574	0.058	0.241	0.981	0.963	0.462	0.621	0.377	0.742	0.886
Cyclophilin A			2.78e-05	0.457	4.33e-20	1.15403e-26	0.308								0.286	0.569	0.0817	0.977
QORL1	*	*	4.84e-05	0.427	4.14e-10	9.85993e-13	0.95	0.0296	0.111	0.535	0.47	0.447	0.462	0.758	0.295	0.0682	0.031	0.0517
CRK		*	9.21e-05	0.908	9.23e-17	1.44076e-23	0.00487	0.556	0.346	0.441	0.663	0.68	0.0794	0.0649	0.417	0.521	0.0468	0.254
Thrombin			0.000103	8e-05	0.000713	0.0190975	0.945
MUC1	*		0.00015	0.0107	0.0134	0.021121	0.0192	0.623	0.397	0.448	0.685	0.0315	0.389	0.81	0.0805	0.535	0.327	0.365
AN32B	*		0.000159	0.0476	0.0169	0.000792632	0.701	0.36	0.533	0.276	0.00309	0.294	0.236	0.325
Rab GDP dissociation inhibitor beta	*		0.000165	0.323	8.67e-16	1.41358e-13	0.0376	0.0549	0.0096	0.683	0.0108	0.235	0.00978	2.28e-05
Cathepsin A	*		0.000174	0.00388	0.338	0.0643186	0.0373	0.0142	0.0224	0.578	0.0418	0.225	0.0391	0.000821	0.521	0.0964	0.426	0.287
STAT6	*		0.000179	0.00533	0.502	0.520616	0.75	0.395	0.19	0.0968	0.167	0.908	0.283	0.000837
MIF	*		0.000258	0.225	5.76e-15	3.51434e-16	0.244	0.00465	0.178	0.16	8.07e-08	0.00791	1.94e-05	0.00183	0.166	0.186	0.322	0.699
# proteins replicated*	19	11
The table shows the 31 proteins that were associated with TREM2 risk variant carriers vs controls in CSF after Bonferroni correction, as well as the p-values for those proteins for other AD-related traits. For CSF, we also show the p-value for the association of TREM2 varient carriers vs sporadic AD, sporadic AD status, pTau/Aβ42 and age at onset. For brain tissue we show the p-value for TREM2 ri…
1: P-value < 0.05 is boldfaced
*: Denotes when a protein replicated on other tissue. proteins were replicated in both brain and plasma

## Sheet: ST9
Supplementary Table 9: Proteins associated with TREM2 variant carriers vs sporadic AD case in CSF after Bonferroni correction
Protein	Support from other tissues		P-value in CSF1					P-value in brain							P-value in plasma
	Brain	Plasma	TREM2 vs sAD	TREM2 vs CO	sAD vs CO	pTau/Aβ42	Age at Onset	TREM2 vs sAD	TREM2 vs CO	sAD vs CO	CDR at death	Braak Abeta	Braak Tau	Age at Onset	TREM2 vs sAD	TREM2 vs CO	sAD vs CO	Age at Onset
Somatostatin-28	*	*	1.02e-11	3.07e-08	1.69e-09	0.07685	0.0605	0.407	0.0264	0.131	0.411	0.227	0.0305	0.786	0.0086	0.0197	0.401	0.593
VEGF-C	*		4.43e-06	0.00591	1.05e-05	0.15432	0.448	0.606	0.767	0.871	0.156	0.167	0.0109	0.014	0.192	0.474	0.151	0.693
HHLA2	*		4.42e-05	0.000467	0.0299	0.313585	0.0696	0.594	0.343	0.301	0.432	0.318	0.0414	0.0196	0.987	0.898	0.919	0.305
TIMP-3			5e-05	0.0201	0.0572	0.0730706	0.282	0.603	0.625	0.639	0.508	0.127	0.852	0.622
Calcineurin	*	*	5.36e-05	0.0236	4.52e-40	5.12704e-60	3.39e-05	0.00997	0.42	0.00129	0.94	0.864	0.315	0.254	0.48	0.00555	0.0289	0.565
ANGL4		*	6.27e-05	0.00565	0.145	0.0391953	0.842								0.216	0.0393	0.00909	0.115
sFRP-3	*		7.88e-05	0.0392	0.000666	0.456603	0.557	0.843	0.0903	0.0348	0.172	0.883	0.00589	0.429
Thrombin			8e-05	0.000103	0.000713	0.0190975	0.945
Nucleoside diphosphate kinase A			0.000195	8.96e-07	0.0304	0.00179357	0.337	0.283	0.873	0.546	0.462	0.212	0.195	0.675
6-Phosphogluconate dehydrogenase	*		0.000242	0.172	4.99e-07	4.31876e-05	0.905	0.288	0.258	0.05	3.5e-07	0.000703	8.43e-08	2.97e-06
# proteins replicated*	6	3
The table shows the 10 proteins that were associated with TREM2 risk variant carriers vs sporadic AD in CSF after Bonferroni correction, as well as the p-values for those proteins for other AD-related traits. For CSF, we also show the p-value for the association of TREM2 varient carriers vs controls, sporadic AD status, pTau/Aβ42 and age at onset. For brain tissue we show the p-value for TREM2 ri…
1: P-value < 0.05 is boldfaced
*: Denotes when a protein replicated on other tissues. 2 proteins were replicated in both brain and plasma

## Sheet: ST10
Supplementary Table 10: Proteins associated with TREM2 variant carriers vs controls in plasma after Bonferroni correction
Protein	Support from other tissues		P-value in plasma1				P-value in brain							P-value in CSF
	Brain	CSF	TREM2 vs CO	TREM2 vs sAD	sAD vs CO	Age at Onset	TREM2 vs CO	TREM2 vs sAD	sAD vs CO	CDR at death	Braak Abeta	Braak Tau	Age at Onset	TREM2 vs CO	TREM2 vs sAD	sAD vs CO	pTau/Aβ42	Age at Onset
PCSK7		*	5.04e-18	2.06e-05	1.12e-10	0.239	0.269	0.673	0.639	0.139	0.504	0.586	0.416	0.000845	0.109	0.036	0.189126	0.0109
Bone proteoglycan II	*	*	5.11e-11	0.00228	0.00243	0.938	0.903	0.718	0.584	0.0033	0.103	0.00405	0.00776	0.0483	0.0493	0.592	0.0842535	0.382
CREL1			9.63e-11	6.84e-05	0.0281	0.542	0.858	0.579	0.916	0.522	0.89	0.119	0.105	0.281	0.0426	0.107	0.514323	0.167
BARK1	*		2.25e-10	0.0511	2.13e-08	0.187	0.25	0.135	0.724	0.000726	0.24	0.00215	0.0285
SOST			1.31e-09	0.00147	0.00761	0.0902
PAPP-A	*	*	1.41e-09	0.000561	0.0577	0.0418	0.162	0.951	0.35	0.0527	0.942	0.363	0.00672	0.213	0.137	0.959	0.218358	0.00268
ERK-1	*	*	1.59e-09	0.0227	1.79e-09	0.197	0.335	0.392	0.0289	0.0133	0.256	0.0931	0.629	0.0664	0.0581	3.03e-16	1.74934e-18	0.355
C1-Esterase Inhibitor		*	6.31e-08	0.14	0.00141	0.861	0.204	0.455	0.662	0.549	0.159	0.991	0.496	0.0331	0.855	0.000913	0.0382727	0.00142
Apo B			7.01e-08	0.0498	1.57e-09	0.684	0.766	0.847	0.457	0.0894	0.217	0.366	0.677
suPAR	*	*	1.02e-07	0.0011	0.0317	0.157	0.24	0.704	0.309	0.038	0.262	0.119	1.82e-06	1	0.636	0.055	1.91645e-06	0.0246
Cripto			1.17e-07	8.79e-06	0.175	0.944								0.433	0.602	0.619	0.118513	0.94
BAFF	*		1.67e-07	0.0203	0.000565	0.48	0.939	0.0576	0.0762	0.00637	0.00168	0.0991	0.691	0.0626	0.808	0.109	0.264117	0.454
HMG-1	*		2.24e-07	0.0099	6.76e-06	0.796	0.0523	0.0526	0.0341	0.00246	0.0862	0.0163	0.11
CTACK	*		2.53e-07	0.104	0.00271	0.469	0.704	0.476	0.905	0.71	0.361	0.262	0.0333
Noggin	*	*	4.45e-07	0.00029	0.0331	0.172	0.193	0.81	0.144	8.54e-07	0.0075	1.07e-06	0.0106	0.00282	0.00107	0.151	0.023904	0.911
ENTP5	*		5.51e-07	0.00289	0.000366	0.983	0.135	0.405	0.0843	0.000304	0.833	0.0235	0.466	0.358	0.746	0.0628	0.119907	0.8
SBDS	*	*	1.31e-06	0.0426	0.00038	0.0114	0.00407	0.00513	0.77	2.36e-05	0.0218	0.00113	0.00452	0.58	0.0346	0.0412	0.00701118	0.864
Calpain I	*		1.85e-06	0.00632	0.000375	0.0643	0.661	0.0948	0.45	0.0178	0.982	0.0205	0.0388
SMAD3			1.85e-06	0.0866	1.96e-05	0.0147	0.553	0.771	0.383	0.667	0.939	0.692	0.659
Contactin-4	*		2.25e-06	0.00255	0.0419	0.00229	0.105	0.172	0.285	0.0128	0.954	0.0259	0.000566	0.524	0.975	0.462	0.983571	0.287
SEM5A			2.73e-06	0.336	0.00037	0.517	0.758	0.0836	0.0843	0.118	0.936	0.663	0.844	0.313	0.115	0.385	0.712437	0.503
Coagulation Factor XI	*		3.06e-06	0.0398	0.000664	0.00129	0.15	0.644	0.0437	0.432	0.403	0.387	0.915	0.842	0.49	0.46	0.598394	0.389
BCAM	*	*	3.15e-06	0.0676	0.00216	0.0633	0.507	0.455	0.749	0.0299	0.638	0.0691	0.188	0.635	0.92	0.221	0.545703	0.000343
uPA	*	*	3.17e-06	0.00634	0.000707	0.321	0.23	0.105	0.756	0.0187	0.536	0.0405	3.02e-05	0.256	0.527	0.0169	0.756417	0.366
VCAM-1	*	*	3.67e-06	0.0106	0.0309	0.0806	0.473	0.483	0.467	0.0894	0.264	0.377	0.0474	0.708	0.383	0.104	0.00400051	0.535
STAT3	*	*	3.77e-06	0.0288	0.000782	0.408	0.846	0.941	0.0446	0.0381	0.162	0.132	9.83e-05	0.0171	0.0325	0.0593	0.0856159	0.039
17-beta-HSD 1			4.69e-06	0.00655	0.145	0.188	0.873	0.977	0.688	0.256	0.0807	0.0824	0.216
H2A3	*		4.93e-06	0.00726	0.00142	0.269	0.376	0.911	0.162	0.00143	0.153	0.0527	0.919
Glypican 3		*	9.94e-06	0.13	0.151	5.8e-05								0.298	0.523	0.857	0.0123683	0.339
S100A4	*	*	1.26e-05	0.0249	0.00678	0.72	0.000713	0.174	0.00218	2.09e-08	0.0819	1.82e-05	0.00276	0.0621	0.626	0.00926	0.160127	0.000231
MAPK2	*		1.37e-05	0.0561	0.00038	0.281	0.649	0.664	0.629	0.933	0.12	0.847	0.00795
SHC1	*	*	1.58e-05	0.072	3.97e-06	0.258	0.0136	0.0608	0.166	0.000118	0.00869	0.000145	0.000144	0.241	0.439	0.3	0.453791	0.000664
IL-18 BPa		*	1.98e-05	0.000334	0.358	0.00906								0.362	0.848	0.123	0.000829559	1.7e-07
ETHE1			2e-05	0.00252	0.000931	0.167
CDON	*	*	2.26e-05	0.0689	2.25e-06	2.97e-05	0.996	0.679	0.868	0.764	0.701	0.0891	0.0194	0.398	0.56	0.159	0.0300184	0.807
KPCI	*		2.3e-05	0.15	2.04e-05	0.782	0.0906	0.114	0.306	0.183	0.787	0.00963	0.000586
dopa decarboxylase	*		2.66e-05	0.00356	0.00493	0.0214	0.879	0.51	0.477	0.0142	0.378	0.0489	0.00124
Transgelin-2		*	3.12e-05	0.000251	0.0375	0.0605	0.0567	0.0482	0.498	0.151	0.251	0.18	0.666	0.07	0.141	0.0724	0.0361935	5.66e-06
ghrelin			3.51e-05	0.00184	0.0422	0.0165
MMP-7	*	*	3.56e-05	0.133	0.00266	1.02e-05	0.112	0.0918	0.292	0.951	0.281	0.261	0.0175	0.633	0.105	0.000192	0.257602	0.000314
MK01			3.72e-05	0.0259	0.0344	0.501	0.498	0.0121	0.0751	0.0922	0.584	0.364	0.93
C5		*	4.58e-05	0.000821	0.267	0.266	0.277	0.0953	0.621	0.471	0.271	0.23	0.263	0.47	0.0449	0.00311	0.000697577	0.437
Aminoacylase-1	*		4.88e-05	0.00788	0.00845	0.0198	0.134	0.392	0.138	0.00171	0.144	9.77e-06	1.62e-05	0.728	0.892	0.841	0.778568	0.787
XTP3A	*	*	5.03e-05	0.546	6.83e-05	0.0972	0.705	0.64	0.0104	0.00926	0.0415	0.238	0.000478	0.0703	0.206	0.736	0.625283	4.6e-05
BPI			5.42e-05	0.0274	0.127	0.842	0.551	0.583	0.445	0.357	0.557	0.238	0.348
VEGF121			6.41e-05	0.118	0.0126	0.835
PIANP	*	*	7.01e-05	0.0992	3.77e-05	0.00014	0.354	0.294	0.834	0.34	0.325	0.564	0.00227	0.244	0.503	0.0194	0.85177	0.558
PIK3CA/PIK3R1	*		7.01e-05	0.245	0.000103	0.768	0.291	0.0357	0.0473	0.00255	0.0973	0.0213	3.1e-05
PTHrP	*	*	8.8e-05	0.406	0.000261	0.431	0.625	0.156	0.0688	0.00361	0.443	0.364	0.68	0.726	0.508	0.0418	0.865089	0.484
VEGF			9.89e-05	0.0594	0.00528	0.00819	0.357	0.534	0.928	0.707	0.339	0.517	0.861	0.668	0.935	0.0861	0.699259	0.153
CHKB	*		0.000103	0.0345	0.00137	0.0379	0.033	0.243	0.017	1.42e-06	0.00719	0.00075	0.196	0.434	0.425	0.643	0.326536	0.115
BSSP4	*	*	0.000113	0.00572	0.0347	0.165	0.66	0.553	0.646	0.0141	0.213	0.172	0.361	0.43	0.115	0.49	0.00816288	0.0568
PGM1	*		0.000119	0.137	0.0463	0.813	0.0171	0.13	0.482	0.000496	0.231	0.00363	0.0021
PKC-B-II		*	0.000131	0.751	0.000183	0.261	0.837	0.933	0.0756	0.162	0.26	0.117	0.109	0.00404	0.0832	0.00899	9.25403e-13	0.093
IL-22BP			0.000132	0.0486	0.00081	0.705
IL-23			0.000141	0.247	0.0119	0.128
UNC5H4	*	*	0.000148	0.00649	0.0192	0.000212	0.133	0.725	0.211	0.00315	0.00845	0.00902	0.00692	0.186	0.0418	0.0044	0.290114	0.87
GDF-11/8			0.000187	0.00645	0.784	0.00122	0.736	0.999	0.778	0.927	0.893	0.274	0.239	0.396	0.825	0.319	0.271501	0.614
PUR8		*	0.000194	0.0809	0.00098	0.387	0.116	0.0361	0.987	0.392	0.497	0.48	0.727	0.000989	0.295	5.78e-05	0.000168684	0.00932
C1QR1	*	*	0.000196	0.002	0.00196	0.0989	0.848	0.837	0.343	0.477	0.224	0.366	0.00396	0.259	0.746	0.823	0.469523	8.25e-05
ING1	*		0.000208	0.0931	0.0509	0.0373	0.0267	0.19	0.00162	5.23e-06	0.0348	0.00366	0.164
SNAA	*		0.000208	0.16	0.00035	0.0944	0.0592		0.965	0.0499	0.587	0.19	0.0166
Kallikrein 7			0.000208	0.19	0.031	0.486		0.00472
HMGN1			0.00021	0.186	0.00231	0.957	0.546	0.0332	0.908	0.359	0.9	0.0576	0.267
hnRNP A/B	*	*	0.000214	0.158	3.48e-05	0.717	0.128	0.441	0.238	0.000226	0.0113	0.00228	0.198	0.00363	0.335	0.000577	4.01225e-07	0.0185
# proteins replicated*	39	29
The table shows the 65 proteins that were associated with TREM2 risk variant carriers vs controls in plasma after Bonferroni correction, as well as the p-values for those proteins for other AD-related traits. For plasma, we also show the p-value for the association of TREM2 varient carriers vs sporadic AD, sporadic AD status, and age at onset. For brain tissue we show the p-value for TREM2 risk v…
1: P-value < 0.05 is boldfaced
*: Denotes when a protein replicated on other tissues. 21 proteins were replicated in both brain and plasma

[truncated: 6 more sheets: ST11, ST12, ST13, ST14, ST15, ST16]
